# Supplementary material for: miR-145-5p attenuates inflammatory response and apoptosis in myocardial ischemia-reperfusion injury by inhibiting (NADPH) oxidase homolog 1
Source: PubMed Central journal article supplement — Exp Anim. 2021 Mar 4;70(3):311–21. doi: 10.1538/expanim.20-0160 (PMC8390312; doi:10.1538/expanim.20-0160), 2021-03-04
Supplement: expanim-70-311-s001.pdf [file expanim-70-311-s001.pdf]

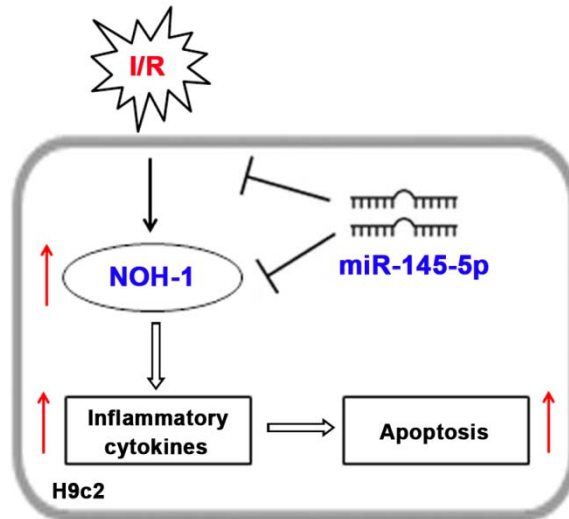

**Supplementary Fig. 1.** A simplified diagram depicting the mechanisms of NOH-1 involved in myocardial I/R.
